# Supplementary material for: Clinical Characteristics of Heart Failure from Case Reports Presented at the Regional Meeting of the Japanese Society of Internal Medicine
Source: PubMed Central journal article supplement — Intern Med. 2019 Jun 7;58(15):2145–50. doi: 10.2169/internalmedicine.2583-18 (PMC6709326; doi:10.2169/internalmedicine.2583-18), 2019-06-07
Supplement: 1349-7235-58-2145-s001.pdf [file 1349-7235-58-2145-s001.pdf]

## **Supplemental Table**

### **Connective tissue diseases: n=25**

CREST syndrome, Goodpasture's syndrome, HLA-B27-positive uveitis, IgG4-related disease, primary biliary cirrhosis–CREST overlap syndrome, remitting seronegative symmetrical synovitis with pitting edema (RS3PE) syndrome, thrombotic microangiopathy with scleroderma renal crisis, scleroderma renal crisis, Sjögren's syndrome, Behçet's disease, malignant rheumatoid arthritis, rheumatic arthritis, ankylosing spondylitis, vascular Behçet's disease, systemic sclerosis, anti-U3RNP antibody-positive systemic sclerosis, anti-centromere antibody-positive Sjögren's syndrome, anti-centromere antibody-positive connective tissue disease-associated pulmonary arterial hypertension, myocardial injury associated with positive anti-mitochondrial antibody, mixed connective tissue disease, autoimmune pericarditis, systemic lupus erythematosus, polymyositis, dermatomyositis, drug-induced lupus erythematosus.

### **Systemic disorders: n=27**

Crow-Fukase (POEMS) syndrome, HELLP syndrome, Heyde syndrome, Kartagener syndrome, Klippel-Trenaunay syndrome, Langerhans cell histiocytosis, Parkes Weber syndrome, Prader-Willi syndrome, SAPHO syndrome, yellow nail syndrome, amyloidosis, AL amyloidosis, AA amyloidosis, ATTR amyloidosis, dialysis-related amyloidosis, senile systemic amyloidosis, Erdheim-Chester disease, sarcoidosis, von Recklinghausen's disease, familial amyloidosis, familial amyloid polyneuropathy, hepatopulmonary syndrome, eosinophilic granulomatosis with polyangiitis, eosinophilic pneumonia, antiphospholipid syndrome, systemic inflammatory response syndrome, systemic capillary leak syndrome.

### **Genetic disorders: n=19**

22q11.2 deletion syndrome, HDR syndrome, Hunter syndrome, Kallmann syndrome, Kearns-Sayre syndrome, LMNA missense, Noonan syndrome (male Turner Syndrome), mosaic Turner syndrome, Peutz-Jeghers syndrome, SCN5A polymorphism (H558R), Klinefelter syndrome, Fabry disease, Marfan syndrome, mitochondrial disease, hereditary hemochromatosis, hereditary cholinesterase deficiency, hereditary hemorrhagic telangiectasia (Osler-Weber-Rendu Disease), neurofibromatosis type 1, recessive inherited epidermolysis bullosa.
